# Supplementary material for: Morpho-Anatomical Characteristics and Volatile Profiles of Pinus nigra J.F.Arnold from the Balkan Peninsula and Southern Carpathians
Source: MDPI journal article supplement (doi:10.3390/f15050739), 2024-04-24
Supplement: s1 [file s1]

## SUPPLEMENTARY MATERIAL

**Table S1.** Location and habitat description of the selected populations of four *P. nigra* taxa from the Balkan Peninsula and Southern Carpathians.

| <i>P. nigra</i> taxa                                              | Locality                                            | Mountain system   | Latitude (N) | Longitude (E) | Altitude (m a.s.l.) | Substratum | Number of individuals analyzed | Date of collection | Vaucher    |
|-------------------------------------------------------------------|-----------------------------------------------------|-------------------|--------------|---------------|---------------------|------------|--------------------------------|--------------------|------------|
| subsp. <i>nigra</i> <sup>1</sup><br>(Black pine or Austrian pine) | Croatia: Mt. Lička Plješevica                       | Dinaric           | 44°39'25.80" | 15°46'7.22"   | 937                 | Limestone  | 10                             | July, 2015         | 13095 HMN  |
|                                                                   | Bosnia and Herzegovina: Mt. Bijela Gora, Arandelovo | Dinaric           | 42°41'59.27" | 18°31'57.65"  | 379                 | Limestone  | 10                             | August, 2013       | 7032 HMN   |
|                                                                   | Serbia: Mt. Tara, Zmajevački potok                  | Dinaric           | 43°51'33.68" | 19°24'57.76"  | 869                 | Serpentine | 10                             | June, 2013         | 6942 HMN   |
|                                                                   | Serbia: Kremna, Tarabići                            | Dinaric           | 43°52'25.01" | 19°34'50.39"  | 800                 | Serpentine | 10                             | May, 2013          | 6935 HMN   |
|                                                                   | Serbia: Mt. Zlatibor, Tornik                        | Dinaric           | 43°39'59.88" | 19°37'33.38"  | 1173                | Serpentine | 10                             | May, 2013          | 6918 HMN   |
|                                                                   | Serbia: Prijepolje, Mileševka Canyon                | Dinaric           | 43°21'23.72" | 19°45'13.62"  | 853                 | Limestone  | 10                             | July, 2013         | 6920 HMN   |
|                                                                   | Serbia: Goč Mt., Gvozdačka reka                     | Dinaric           | 43°32'19.41" | 20°41'41.02"  | 1162                | Serpentine | 10                             | June, 2013         | 7030 HMN   |
| subsp. <i>dalmatica</i> <sup>1</sup><br>(Dalmatian black pine)    | Croatia: Brač, Vidova Gora                          | Dinaric           | 43°16'47.78" | 16°37'4.33"   | 764                 | Limestone  | 11                             | August, 2016       | 13096 HMN  |
| subsp. <i>banatica</i> <sup>2</sup><br>(Banat black pine)         | Romania: Mt. Domogled, the Cerna Valley             | Carpathian-Balkan | 44°52'52.68" | 22°25'39.32"  | 670                 | Limestone  | 10                             | July, 2013         | 17089 BEOU |
|                                                                   | Romania: Svinita, the Danube Valley                 | Carpathian-Balkan | 44°29'00.16" | 22°08'35.58"  | 180                 | Limestone  | 10                             | July, 2013         | 17090 BEOU |
|                                                                   | Serbia: Lazareva Reka Canyon, Kovej                 | Carpathian-Balkan | 44°0'47.05"  | 21°55'15.27"  | 698                 | Limestone  | 10                             | July, 2013         | 7031 HMN   |
|                                                                   | Serbia: Jerma Canyon, Tikva                         | Carpathian-Balkan | 42°58'35.14" | 22°37'22.63"  | 694                 | Limestone  | 10                             | July, 2013         | 7029 HMN   |
| subsp. <i>pallasiana</i> <sup>1</sup><br>(Crimean black pine)     | Bulgaria: Mt. Rhodopes, Dobrostan                   | Rhodopean         | 41°53'55.24" | 24°55'49.91"  | 1158                | Silicate   | 10                             | September, 2020    | 14392 HMN  |
|                                                                   | Bulgaria: Mt. Pirin, Dobrinishte                    | Rhodopean         | 41°47'58.55" | 23°33'58.47"  | 1008                | Silicate   | 10                             | September, 2020    | 14393 HMN  |

|                                   |                   |               |              |      |            |    |                    |           |
|-----------------------------------|-------------------|---------------|--------------|------|------------|----|--------------------|-----------|
| Serbia: Mt. Dukat,<br>Jarešnik    | Rhodopean         | 42°24'7.25"   | 22°23'25.12" | 1440 | Silicate   | 10 | July, 2013         | 7027 HMN  |
| Macedonia: Strumica, Tri<br>Vodi  | Rhodopean         | 41°24'36.00"  | 22°37'38.00" | 320  | Silicate   | 10 | July, 2013         | 7028 HMN  |
| Greece: Mt. Smolikas,<br>Pades    | Scardo-<br>Pindic | 40° 03'36.22" | 20°54'26.74" | 1564 | Serpentine | 20 | July, 2017         | 13295 HMN |
| Greece: Zouzouli-<br>Eptachori    | Scardo-<br>Pindic | 40°20'82.40"  | 21°01'77.22" | 1294 | Limestone  | 10 | September,<br>2015 | 11961 HMN |
| Greece: Mt. Olympus,<br>Kalamaras | Scardo-<br>Pindic | 40°01'40.50"  | 22°41'61.30" | 1536 | Limestone  | 10 | September,<br>2015 | 11960 HMN |

<sup>1</sup>Accepted subspecies according to Gaussen et al. [10], Euro+Med [11] and WFO [12]. <sup>2</sup>Accepted subspecies according to Ciocârlan [18].

Table S2. Morpho-anatomical characteristics of the needles of studied *P. nigra* populations classified according to mountain systems: descriptive statistics, results of ANOVA, and *post-hoc* tests.

| No. | Morpho-anatomical characteristics                    | F    | p   | Dinaric<br><i>n</i> =81   | Carpathian-Balkan<br><i>n</i> =40 | Rhodopean<br><i>n</i> =40 | Scardo-Pindic<br><i>n</i> =40 |
|-----|------------------------------------------------------|------|-----|---------------------------|-----------------------------------|---------------------------|-------------------------------|
|     |                                                      |      |     | <i>X</i> ± <i>SD</i>      | <i>X</i> ± <i>SD</i>              | <i>X</i> ± <i>SD</i>      | <i>X</i> ± <i>SD</i>          |
| 1.  | Needle length (cm)                                   | 25.5 | *** | 9.6±1.9 <sup>a</sup>      | 8.6±1.2 <sup>a</sup>              | 11.2±1.4 <sup>b</sup>     | 12.4±1.3 <sup>b</sup>         |
| 2.  | Needle width (µm)                                    | 15.9 | *** | 1681.6±227.6 <sup>a</sup> | 1638.4±153.8 <sup>a</sup>         | 1705.5±147.4 <sup>a</sup> | 1769.7±163.5 <sup>b</sup>     |
| 3.  | Needle thickness (µm)                                | 17.1 | *** | 964.3±113.0 <sup>bc</sup> | 850.4±116.0 <sup>a</sup>          | 958.0±90.9 <sup>b</sup>   | 1021.5±85.0 <sup>c</sup>      |
| 4.  | Endodermis tube perimeter (µm)                       | 26.7 | *** | 2130.6±310.6 <sup>b</sup> | 1839.7±203.2 <sup>a</sup>         | 2064.3±227.6 <sup>b</sup> | 2367.5±199.8 <sup>c</sup>     |
| 5.  | Number of resin ducts                                | 19.6 | *** | 5.5±2.5 <sup>a</sup>      | 4.4±2.1 <sup>a</sup>              | 4.7±2.2 <sup>a</sup>      | 8.0±2.1 <sup>b</sup>          |
| 6.  | Resin duct diameter (µm)                             | 6.8  | *** | 115.4±15.2 <sup>b</sup>   | 115.1±10.5 <sup>b</sup>           | 105.3±9.3 <sup>a</sup>    | 110.5±9.9 <sup>ab</sup>       |
| 7.  | Distance between resin duct and endodermis tube (µm) | 10.6 | *** | 102.0±14.4 <sup>a</sup>   | 99.7±15.1 <sup>a</sup>            | 99.5±18.0 <sup>a</sup>    | 118.0±22.0 <sup>b</sup>       |
| 8.  | Epidermis+cuticle thickness (µm)                     | 13.6 | *** | 32.7±3.3 <sup>b</sup>     | 31.3±3.0 <sup>b</sup>             | 31.1±3.6 <sup>b</sup>     | 26.9±7.5 <sup>a</sup>         |
| 9.  | Hypodermis thickness (µm)                            | 10.0 | *** | 75.4±14.1 <sup>a</sup>    | 68.6±11.0 <sup>a</sup>            | 73.4±20.8 <sup>a</sup>    | 87.1±13.5 <sup>b</sup>        |

F: ANOVA F-test. p: level of significance (\*\*\*: p<0.001).  
*n*: the number of analyzed individuals.  
*X*: mean. *SD*: standard deviation. Means with different superscript letters within the same row (a, b, c) differ significantly (Tukey's HSD for unequal N *post-hoc* test).

Table S3. HS needle volatiles of studied *P. nigra* populations classified according to mountain systems: descriptive statistics, results of ANOVA, and *post-hoc* tests.

| No.                        | Compounds                   | RI         | LI         | F   | p   | Dinaric<br><i>n</i> =81       | Carpathian-<br>Balkan<br><i>n</i> =40 | Rhodopean<br><i>n</i> =40    | Scardo-Pindic<br><i>n</i> =40 |
|----------------------------|-----------------------------|------------|------------|-----|-----|-------------------------------|---------------------------------------|------------------------------|-------------------------------|
|                            |                             |            |            |     |     | <i>X</i> ± <i>SD</i>          | <i>X</i> ± <i>SD</i>                  | <i>X</i> ± <i>SD</i>         | <i>X</i> ± <i>SD</i>          |
| 1.                         | Tricyclene                  | 921        | 921        | 0.4 | ns  | 0.0±0.1                       | 0.0±0.1                               | 0.0±0.2                      | 0.0±0.1                       |
| 2.                         | α-Thujene                   | 926        | 924        | 2.5 | ns  | 1.1±1.0                       | 0.8±0.9                               | 0.7±0.8                      | 1.0±0.6                       |
| <b>3.</b>                  | <b>α-Pinene</b>             | <b>934</b> | <b>932</b> | 4.0 | **  | <b>74.7±10.9<sup>ab</sup></b> | <b>79.5±6.5<sup>b</sup></b>           | <b>71.1±12.6<sup>a</sup></b> | <b>75.4±9.3<sup>ab</sup></b>  |
| 4.                         | Camphene                    | 949        | 946        | 5.4 | **  | 1.1±0.4 <sup>ab</sup>         | 1.2±0.6 <sup>ab</sup>                 | 0.9±0.5 <sup>a</sup>         | 1.4±0.5 <sup>b</sup>          |
| 5.                         | Sabinene                    | 971        | 969        | 3.8 | *   | 0.1±0.3 <sup>b</sup>          | 0.0±0.1 <sup>ab</sup>                 | 0.0±0.0 <sup>a</sup>         | 0.0±0.0 <sup>ab</sup>         |
| <b>6.</b>                  | <b>β-Pinene</b>             | <b>980</b> | <b>974</b> | 3.7 | *   | <b>10.6±10.3<sup>ab</sup></b> | <b>8.0±6.6<sup>a</sup></b>            | <b>15.7±14.9<sup>b</sup></b> | <b>8.3±9.6<sup>ab</sup></b>   |
| 7.                         | Myrcene                     | 990        | 988        | 2.3 | ns  | 1.1±0.5                       | 1.0±0.5                               | 0.9±0.4                      | 1.1±0.2                       |
| 8.                         | Limonene+β-<br>Phellandrene | 1029       | 1024/1025  | 7.2 | *** | 2.6±2.0 <sup>b</sup>          | 1.5±0.8 <sup>a</sup>                  | 1.6±0.7 <sup>a</sup>         | 2.1±0.7 <sup>ab</sup>         |
| 9.                         | ( <i>E</i> )-β-ocimene      | 1044       | 1044       | 4.2 | **  | 0.3±0.4 <sup>a</sup>          | 0.3±0.5 <sup>a</sup>                  | 0.4±0.5 <sup>a</sup>         | 0.7±0.6 <sup>b</sup>          |
| 10.                        | Terpinolene                 | 1087       | 1086       | 1.9 | ns  | 0.6±0.7                       | 0.4±0.6                               | 0.4±0.4                      | 0.4±0.4                       |
| 11.                        | ( <i>E</i> )-Caryophyllene  | 1420       | 1417       | 3.7 | *   | 2.2±1.3 <sup>a</sup>          | 2.1±1.4 <sup>a</sup>                  | 2.1±1.6 <sup>a</sup>         | 2.9±1.2 <sup>b</sup>          |
| 12.                        | Germacrene D                | 1485       | 1484       | 1.7 | ns  | 5.6±3.3                       | 5.1±2.7                               | 6.1±3.7                      | 6.7±3.0                       |
| Total                      |                             |            |            |     |     | 100.0±0.6                     | 99.9±0.3                              | 99.9±0.3                     | 100.0±0.1                     |
| Monoterpene hydrocarbons   |                             |            |            |     |     | 92.1±4.0                      | 92.8±3.4                              | 91.7±4.7                     | 90.4±3.5                      |
| Sesquiterpene hydrocarbons |                             |            |            |     |     | 7.8±3.9                       | 7.2±3.4                               | 8.2±4.7                      | 9.6±3.5                       |

RI: Experimental linear retention indices relative to C<sub>8</sub>-C<sub>20</sub> alkanes. LI: Literature indices-Adams' retention indices.  
F: ANOVA F-test. p: level of significance (ns: not significant; \*: p<0.05; \*\*: p<0.01; \*\*\*: p<0.001).  
*n*: the number of analyzed individuals.  
*X*: mean. *SD*: standard deviation. Means with different superscript letters within the same row (a, b, c) differ significantly (Tukey's HSD for unequal *N post-hoc* test).  
The HS volatiles recorded in the average content >10% in at least one of the studied mountain systems are in boldface.
